# Supplementary material
Source: PubMed Central journal article supplement (PMC6660647)
Supplement: NIHMS1035799-supplement-Supplemental_Table_1.pdf [file NIHMS1035799-supplement-Supplemental_Table_1.pdf]

**Supplemental Table 1: Codes used to identify comorbidities and procedures**

|                             | Source   | Codes                                       |
|-----------------------------|----------|---------------------------------------------|
| Hypertension                | NIS      | Elixhauser comorbidity                      |
| Diabetes                    | NIS      | Elixhauser comorbidity                      |
| Dyslipidemia                | CCS      | CCS 53                                      |
| Current smoking             | ICD-9-CM | 305.1                                       |
| Obesity                     | NIS      | Elixhauser comorbidity                      |
| Coronary artery disease     | CCS      | CCS 101                                     |
| Prior PCI                   | ICD-9-CM | V45.82                                      |
| Prior CABG                  | ICD-9-CM | V45.81                                      |
| Prior stroke/TIA            | ICD-9-CM | V12.54                                      |
| Anemia                      | NIS      | Elixhauser comorbidity                      |
| Renal failure               | NIS      | Elixhauser comorbidity                      |
| Chronic pulmonary disease   | NIS      | Elixhauser comorbidity                      |
| Peripheral vascular disease | NIS      | Elixhauser comorbidity                      |
| Atrial fibrillation         | ICD-9-CM | 427.31                                      |
|                             |          | 37.70, 37.71, 37.72, 37.73,                 |
| Permanent pacemaker         | ICD-9-CM | 37.74, 37.80, 37.81, 37.82,<br>37.83, 00.50 |

CABG: coronary artery bypass grafting, CCS: Clinical Classifications Software, ICD-9-CM: International Classification of Diseases 9<sup>th</sup> Edition, NIS: national inpatient sample, TIA: transient ischemic attack
